# Supplementary material for: Dysregulation of lncRNA–miRNA–mRNA Interactome as a Marker of Metastatic Process in Ovarian Cancer
Source: MDPI journal article supplement (doi:10.3390/biomedicines10040824), 2022-03-31
Supplement: s1 [file s1]

**Supplementary Table S6.** Primer sequences and temperature conditions.

| RNA       | Primer sequences            | T, °C |
|-----------|-----------------------------|-------|
| CCAT1     | F: CTCCAATGGTGAGGAGGTTTAG   | 62    |
|           | R: GGCTAGTTAGAGCCGAGATTTG   |       |
| SNHG14    | F: CCTCCTCCCTCAACCAAATATC   | 62    |
|           | R: GCCAGAACTACAGTGTCAGTAA   |       |
| MALAT1    | F: GGCTCTTCCTTCTGTTCTAGTG   | 62    |
|           | R: CCTCCCATCCCTCCAAATTC     |       |
| MAFG-DT   | F: GAGACCAGCATTGGTAACATAGA  | 60    |
|           | R: CTCCTGAATAGCTGGGACAAC    |       |
| OIP5-AS1  | F: GGAGAGGAACTAACCGAACATT   | 61    |
|           | R: GCGCCTAACACTTTGCTTTAG    |       |
| MLK7-AS1  | F: GCTGGGAGAGGTAAGTTGAAG    | 63    |
|           | R: AACTCCATCTCCTGCGTTTAG    |       |
| LINC00339 | F: CCCATGTCTGGATCTCTCTTTG   | 62    |
|           | R: AGCAGGCTGATTGTCCTAAC     |       |
| TUG1      | F: GTGCAGAAGCCCAGAGTAAA     | 62    |
|           | R: CCACGGTGGTAAAGGAAGATAG   |       |
| UCA1      | F: GACCCTACCCGGTCATTTATAG   | 63    |
|           | R: CTGATGGGCATGGCTTTATTC    |       |
| DSCAM-AS1 | F: CAGAGAATGCTGAGAGCAGAG    | 63    |
|           | R: TCCCAAAGTGCTGGGATTAC     |       |
| c-MET     | F: AGCGTCAACAGAGGGACCT      | 62    |
|           | R: GCAGTGAACCTCCGACTGTATG   |       |
| TGFB2     | F: TGCAGAACCCAAAAGCCAGAGTG  | 60    |
|           | R: TACAAAAGTGCAGCAGGGACAGTG |       |
| B2M       | F: TGACTTTGTACAGCCCAAGATAG  | 64    |
|           | R: CAAATGCGGCATCTTCAAACCTC  |       |
| WNT4      | F: AGGAGGAGACGTGCGAGAAA     | 62    |
|           | R: CGAGTCCATGACTTCCAGGT     |       |
| MAPK1     | F: TCACACAGGGTTCCTGACAGA    | 61    |
|           | R: ATGCAGCCTACAGACCAAATATC  |       |
| AURKA     | F: TGGGTGGTCAGTACATGCTC     | 61    |
|           | R: TGCATCCGACCTTCAATCATTTT  |       |
| BCL2      | F: GGTGGGGTCATGTGTGTGG      | 62    |
|           | R: CGGTTCAGGTACTCAGTCATCC   |       |
| CDK4      | F: TCAGCACAGTTCGTGAGGTG     | 62    |
|           | R: GTCCATCAGCCGGACAACAT     |       |

|       |                            |    |
|-------|----------------------------|----|
| YAP1  | F: TAGCCCTGCGTAGCCAGTTA    | 62 |
|       | R: TCATGCTTAGTCCACTGTCTGT  |    |
| ZEB1  | F: GAGTTGGAAAGGGCCTACTG    | 62 |
|       | R: GTTGTTATGGTGGGCATGTATTT |    |
| ZEB2  | F: CAAGAGGCGCAAACAAGCC     | 63 |
|       | R: CAGCTACGCCTTCTCGGTCT    |    |
| CCND1 | F: TGGAGCCCGTGAAAAAGAGC    | 61 |
|       | R: TCTCCTTCATCTTAGAGGCCAC  |    |
| ADAM9 | F: TCCATTGCTCTTAGCGACTGT   | 60 |
|       | R: GGGGTTCAATCCCATAACTCG   |    |
| SOX4  | F: AGCGACAAGATCCCTTTCATTC  | 62 |
|       | R: CGTTGCCGGACTTCACCTT     |    |
